# Supplementary material
Source: publisher figshare collection journal article supplement (https://sage.figshare.com/ndownloader/files/17282462)
Supplement: Supplementary file 1 [file 17282462]

## Supplemental file—survey

Participant ID \_\_\_\_\_

Demographics

What grade are you in? \_\_\_\_\_

Are you a (circle one):      boy      girl      other

Do you have a disability?

Yes      (please tell us what kind of disability) \_\_\_\_\_ No

What did you like **most** about the robotics program?

What did you like **least** about the programs (or an area you would like to see improved).

Is there anything else that you would like to share about the HB *FIRST*® Robotics program?

| <b>Quality of the HB <i>FIRST</i>® experience</b> (adapted from (Melchior, Cohen, Cutter, & Leavitt, 2005)) |                       |                       |                       |                       |
|-------------------------------------------------------------------------------------------------------------|-----------------------|-----------------------|-----------------------|-----------------------|
| Statement                                                                                                   | Strongly Agree        | Agree                 | Disagree              | Strongly Disagree     |
| Kids in my group made the important decisions, not the adults.                                              | <input type="radio"/> | <input type="radio"/> | <input type="radio"/> | <input type="radio"/> |
| I had a chance to do lots of different jobs in my group.                                                    | <input type="radio"/> | <input type="radio"/> | <input type="radio"/> | <input type="radio"/> |
| I had real responsibilities in my group.                                                                    | <input type="radio"/> | <input type="radio"/> | <input type="radio"/> | <input type="radio"/> |
| I had a chance to be both a designer and a builder                                                          | <input type="radio"/> | <input type="radio"/> | <input type="radio"/> | <input type="radio"/> |
| I had fun working in the HB <i>FIRST</i> ® group.                                                           | <input type="radio"/> | <input type="radio"/> | <input type="radio"/> | <input type="radio"/> |
| I felt like I really belonged in my group.                                                                  | <input type="radio"/> | <input type="radio"/> | <input type="radio"/> | <input type="radio"/> |

| <b>Impacts from the HB <i>FIRST</i>® Experience</b> (adapted from (Melchior, Cohen, Cutter, & Leavitt, 2005))    |                       |                       |                       |                       |
|------------------------------------------------------------------------------------------------------------------|-----------------------|-----------------------|-----------------------|-----------------------|
| Statement                                                                                                        | Strongly Agree        | Agree                 | Disagree              | Strongly Disagree     |
| HB <i>FIRST</i> ® helped me understand the value of working in a group                                           | <input type="radio"/> | <input type="radio"/> | <input type="radio"/> | <input type="radio"/> |
| I gained a better understanding of how math, science and technology are used to solve problems in the real world | <input type="radio"/> | <input type="radio"/> | <input type="radio"/> | <input type="radio"/> |
| I gained a sense of self-confidence by being in HB <i>FIRST</i> ®                                                | <input type="radio"/> | <input type="radio"/> | <input type="radio"/> | <input type="radio"/> |
| My interest in science and technology greatly increased as a result of being in HB <i>FIRST</i> ®                | <input type="radio"/> | <input type="radio"/> | <input type="radio"/> | <input type="radio"/> |
| HB <i>FIRST</i> ® helped motivate me to do better in school                                                      | <input type="radio"/> | <input type="radio"/> | <input type="radio"/> | <input type="radio"/> |

|                                                                                             |                       |                       |                       |                       |
|---------------------------------------------------------------------------------------------|-----------------------|-----------------------|-----------------------|-----------------------|
| I gained a better idea of what I wanted to study in school as a result of HB <i>FIRST</i> ® | <input type="radio"/> | <input type="radio"/> | <input type="radio"/> | <input type="radio"/> |
|---------------------------------------------------------------------------------------------|-----------------------|-----------------------|-----------------------|-----------------------|

| <b>Skills Gained Through HB <i>FIRST</i>® (adapted from (Melchior, Cohen, Cutter, &amp; Leavitt, 2005))</b> |                       |                       |                       |                       |
|-------------------------------------------------------------------------------------------------------------|-----------------------|-----------------------|-----------------------|-----------------------|
| Statement                                                                                                   | A Lot                 | Some                  | Very Little           | Not at All            |
| HB <i>FIRST</i> ® helped me weigh different issues and possibilities before making a decision               | <input type="radio"/> | <input type="radio"/> | <input type="radio"/> | <input type="radio"/> |
| I learned how to listen and respond to other people's suggestions or concerns                               | <input type="radio"/> | <input type="radio"/> | <input type="radio"/> | <input type="radio"/> |
| HB <i>FIRST</i> ® helped me talk with people to get the information I need                                  | <input type="radio"/> | <input type="radio"/> | <input type="radio"/> | <input type="radio"/> |
| It taught me to get along with other students, teachers, and adults                                         | <input type="radio"/> | <input type="radio"/> | <input type="radio"/> | <input type="radio"/> |
| I learned to work within the rules of a group                                                               | <input type="radio"/> | <input type="radio"/> | <input type="radio"/> | <input type="radio"/> |
| I learned how to manage my time                                                                             | <input type="radio"/> | <input type="radio"/> | <input type="radio"/> | <input type="radio"/> |
| I learned new ways of thinking or acting from other people                                                  | <input type="radio"/> | <input type="radio"/> | <input type="radio"/> | <input type="radio"/> |
| HB <i>FIRST</i> ® gave me confidence to work with people that I do not know                                 | <input type="radio"/> | <input type="radio"/> | <input type="radio"/> | <input type="radio"/> |
| HB <i>FIRST</i> ® has taught me to stop or decrease conflicts between people                                | <input type="radio"/> | <input type="radio"/> | <input type="radio"/> | <input type="radio"/> |
| I learned how to use computers to analyze information                                                       | <input type="radio"/> | <input type="radio"/> | <input type="radio"/> | <input type="radio"/> |
| I learnt to use practical math skills, such as graphs and tables                                            | <input type="radio"/> | <input type="radio"/> | <input type="radio"/> | <input type="radio"/> |

Melchior, A., Cohen, F., Cutter, T., & Leavitt, T. (2005). More than robots: An evaluation of the FIRST robotics competition and institutional impacts. In. New Hampshire.
